# Supplementary material
Source: PubMed Central journal article supplement (PMC4524762)
Supplement: supp_the2015-0202_Bang-15-202.pdf [file supp_the2015-0202_Bang-15-202.pdf]

## Overview

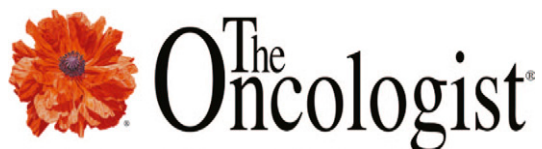

The official journal of the Society for Translational Oncology

**First Published Online June 25, 2015**

**DOI:** 10.1634/theoncologist.2015-0202

**Title:** Phase I/II Study of Weekly Oraxol for the Second-Line Treatment of Patients With Metastatic or Recurrent Gastric Cancer

**Authors:** Keun-Wook Lee,<sup>a,b,\*</sup> Kyung Hee Lee,<sup>c,\*</sup> Dae Young Zang,<sup>d</sup> Young Iee Park,<sup>e</sup> Dong Bok Shin,<sup>f</sup> Jin Won Kim,<sup>a,b</sup> Seock-Ah Im,<sup>b</sup> Sung Ae Koh,<sup>c</sup> Kyung-Sang Yu,<sup>g</sup> Joo-Youn Cho,<sup>g</sup> Jin-A Jung,<sup>h</sup> Yung-Jue Bang<sup>b</sup>

<sup>a</sup>Department of Internal Medicine, Seoul National University Bundang Hospital, Seongnam, Republic of Korea; <sup>b</sup>Department of Internal Medicine, Seoul National University College of Medicine, Seoul, Republic of Korea; <sup>c</sup>Department of Internal Medicine, Yeungnam University Hospital, Daegu, Republic of Korea; <sup>d</sup>Department of Internal Medicine, Hallym University Sacred Heart Hospital, Anyang, Republic of Korea; <sup>e</sup>Research Institute and Hospital, National Cancer Center, Goyang, Republic of Korea; <sup>f</sup>Department of Internal Medicine, Gachon University Gil Hospital, Incheon, Republic of Korea; <sup>g</sup>Department of Clinical Pharmacology and Therapeutics, Seoul National University Hospital, Seoul National University College of Medicine, Seoul, Republic of Korea; <sup>h</sup>Clinical Research Team, Hanmi Pharmaceutical Co., Ltd., Seoul, Republic of Korea

\*Contributed equally.

**ClinicalTrials.gov Identifier:** NCT01491217

**Sponsor(s):** Hanmi Pharmaceutical Co., Ltd., Seoul, Republic of Korea

**Principal Investigator:** Yung-Jue Bang

**IRB Approved:** Yes

### Disclosures

**Seock-Ah Im:** Roche, Novartis, AstraZeneca (C/A), AstraZeneca (RF); **Jin-A Jung:** Hanmi Pharmaceutical Co., Ltd. (E); **Yung-Jue Bang:** Hanmi Pharmaceutical Co., Ltd. (RF). The other authors indicated no financial relationships.

(C/A) Consulting/advisory relationship; (RF) Research funding; (E) Employment; (ET) Expert testimony; (H) Honoraria received; (OI) Ownership interests; (IP) Intellectual property rights/inventor/patent holder; (SAB) Scientific advisory board

## Lessons Learned

- Oraxol, a novel oral formulation of paclitaxel, displayed modest efficacy as second-line chemotherapy for gastric cancer.
- Considering its favorable toxicity profiles, further studies are warranted in various solid tumors including gastric cancer.

## Author Summary: Abstract and Brief Discussion

### Background

Oraxol consists of paclitaxel and HM30181A, a P-glycoprotein inhibitor, to increase the oral bioavailability of paclitaxel. This phase I/II study (HM-OXL-201) was conducted to determine the maximum tolerated dose (MTD) and recommended phase II dose (RP2D) of Oraxol. In addition, we investigated the efficacy and safety of Oraxol as second-line chemotherapy for metastatic or recurrent gastric cancer (GC).

## Methods

In the phase I component, paclitaxel was orally administered at escalating doses (90, 120, or 150 mg/m<sup>2</sup> per day) with a fixed dose (15 mg/day) of HM30181A. Oraxol was administered 6 times per cycle (days 1, 2, 8, 9, 15, and 16) every 4 weeks. In the phase II component, the efficacy and safety of Oraxol were evaluated.

## Results

In the phase I component, the MTD could not be determined. Based on toxicity and pharmacokinetic data, the RP2D of oral paclitaxel was determined to be 150 mg/m<sup>2</sup>. In the phase II component, 4 of 43 patients (9.3%) achieved partial responses. Median progression-free survival and overall survival were 2.6 and 10.7 months, respectively. Toxicity profiles were favorable, and the most common drug-related adverse events (grade ≥3) were neutropenia and diarrhea.

## Conclusion

Oraxol exhibited modest efficacy and favorable toxicity profiles as second-line chemotherapy for GC.

## Discussion

Paclitaxel has been administered intravenously because of its poor oral bioavailability. Because paclitaxel is insoluble in water, the original formulation of paclitaxel contains the vehicle Cremophor EL (CrEL); however, the addition of CrEL causes hypersensitivity reactions and exerts an additive effect on paclitaxel-induced neuropathy. The original formulation of paclitaxel inconveniences patients and increases the risk of toxicities. Consequently, there have been many efforts to develop a new formulation of paclitaxel.

Oraxol is composed of a paclitaxel capsule and an HM30181A tablet (Hanmi Pharmaceutical Co., Ltd., Seoul, Republic of Korea, <http://www.hanmipharm.com>). HM30181A, [2-(2-{4-[2-(6,7-dimethoxy-3,4-dihydro-1*H*-isoquinolin-2-yl)-ethyl]-phenyl}-2*H*-tetrazol-5-yl)-4,5-dimethoxyphenyl]amide, is a novel inhibitor of P-glycoprotein in the gastrointestinal mucosa. In this phase I/II study (HM-OXL-201), both paclitaxel and HM30181A were administered simultaneously on an empty stomach.

In the phase I component of this study ( $n = 10$ ), no dose-limiting toxicity was observed, and thus the MTD could not be determined. In gastric cancer cell lines, paclitaxel exhibited cytotoxicity at concentrations  $>0.01 \mu\text{M}$ . In the pharmacokinetic analysis, the means of  $T_{>0.01}$  (time of plasma concentration of paclitaxel  $>0.01 \mu\text{M}$ ) at three paclitaxel dose levels were 17.7, 43.2, and 47.5 hours, respectively. The area under the plasma concentration-time curves also increased according to the paclitaxel dose. Based on these toxicity and pharmacokinetic data, dose level 3 (oral paclitaxel 150 mg/m<sup>2</sup> per day and HM30181A 15 mg/day, both on days 1, 2, 8, 9, 15, and 16 every 4 weeks) was determined as the RP2D.

In the phase II component ( $n = 46$ ), this weekly Oraxol regimen displayed favorable toxicity profiles. The incidence of severe neutropenia (grade ≥3) was 30.4%, which was similar to that reported in previous phase III trials of conventional weekly paclitaxel (second line) in metastatic or recurrent GC. Severe nonhematologic toxicities were rare. Particularly, Oraxol appears to cause less peripheral neuropathy than conventional weekly paclitaxel. In our study, weekly Oraxol was associated with a response rate (RR) of 9.3% and progression-free survival (PFS), and overall survival (OS) of 2.6 and 10.7 months, respectively (Table 1). Statistically, our study did not meet the primary endpoint (RR); however, clinically, Oraxol appears to have efficacy similar to other cytotoxic agents commonly used as second-line chemotherapy in metastatic or recurrent GC. Regarding conventional weekly paclitaxel, RRs of 9%–20.9% and PFS and OS of 2.9–4.4 and 7.4–9.5 months, respectively, were reported. Although weekly Oraxol treatment did not meet the primary endpoint in this study, we demonstrated that Oraxol has its own advantages (favorable safety profiles, including less neuropathy and no hypersensitivity reactions, and the convenience of oral administration) over conventional paclitaxel. Consequently, we believe that Oraxol is worthy of further investigation. In particular, the combination of Oraxol with various chemotherapeutic agents is expected to be very promising because Oraxol displayed favorable toxicity profiles.

## Trial Information

|                              |                       |
|------------------------------|-----------------------|
| Disease                      | Gastric cancer        |
| Stage of disease / treatment | Metastatic / Advanced |
| Prior Therapy                | 1 prior regimen       |
| Type of study - 1            | Phase II              |
| Type of study - 2            | Single Arm            |

|                           |                                                                                                                                                                   |
|---------------------------|-------------------------------------------------------------------------------------------------------------------------------------------------------------------|
| <b>Primary Endpoint</b>   | To determine the maximum tolerated dose (MTD) and recommended phase 2 dose (RP2D) of a 2-consecutive-day dosing schedule of weekly Oraxol (the phase I component) |
| <b>Primary Endpoint</b>   | Response rate (RR; the phase 2 component)                                                                                                                         |
| <b>Secondary Endpoint</b> | To assess the pharmacokinetic profiles and overall safety of the therapy (the phase I component)                                                                  |
| <b>Secondary Endpoint</b> | Overall survival (OS), progression-free survival (PFS), response duration, and safety profile (the phase II component)                                            |

#### Additional Details of Endpoints or Study Design

The phase I component of this study enrolled patients with histologically confirmed advanced solid tumors for which no more effective chemotherapy or standard treatment was available. Patients were required to have at least one measurable and/or evaluable lesion that could be assessed by imaging. The phase II component enrolled patients with histologically confirmed metastatic or recurrent gastric cancer (GC) that had progressed following first-line palliative chemotherapy or that had recurred within 6 months after the completion of adjuvant chemotherapy. Patients were required to have at least one measurable tumor lesion according to the Response Evaluation Criteria in Solid Tumors (RECIST) version 1.1. Patients who previously received taxane chemotherapy were excluded. For both phase I and II components, other inclusion criteria were same, as follows: aged  $\geq 19$  years; Eastern Cooperative Oncology Group performance status grade 0–2; life expectancy  $\geq 3$  months; adequate function of bone marrow (absolute neutrophil count [ANC]  $\geq 1,500/\text{mm}^3$ , hemoglobin  $\geq 9.0$  g/dL, and platelet count  $\geq 100,000/\text{mm}^3$ ) and other organs; and no prior surgery, radiation therapy, chemotherapy, or immunotherapy in the previous 4 weeks. The exclusion criteria in the phase I and II components were same, as follows: metastasis to the central nervous system, significant gastrointestinal bleeding, massive ascites requiring therapeutic paracentesis, and uncontrolled infection or other serious comorbidity. Patients taking the following medications were excluded: cyclosporin A, verapamil, ritonavir, saquinavir, indinavir, nelfinavir, vitamin A,azole antibiotics, macrolide antibiotics, steroid hormones, dihydropyridine calcium channel blockers, terfenadine, quinidine, midazolam, and phenacetin. If the patient stopped the medication and completed a washout period of  $\geq 1$  week, then the patient could be enrolled in this study.

The phase I component was performed at two institutions (Seoul National University Hospital and National Cancer Center), and four additional institutions joined the phase II component. In the phase I component of this study, the MTD was defined as the highest dose at which  $< 30\%$  of patients experienced a dose-limiting toxicity (DLT) during the first cycle of therapy. DLT was defined as follows: (a) grade 3/4 nausea, vomiting, or diarrhea despite adequate preventive medications (antiemetics or antidiarrheals); (b) grade 3 nonhematologic toxicity that lasted  $\geq 7$  days (except alopecia); (c) grade 4 nonhematologic toxicity regardless of duration; (d) grade 3/4 febrile neutropenia; (e) grade 4 neutropenia that lasted  $\geq 7$  days; and (f) grade 4 thrombocytopenia, grade 3 thrombocytopenia accompanying bleeding or requiring platelet transfusion, or grade 3 thrombocytopenia lasting  $\geq 7$  days. Dose escalation followed the standard 3 + 3 design. Dose escalation above level 3 (oral paclitaxel 300 mg/m<sup>2</sup> per week) was not planned in this study. If the MTD could not be determined after level 3, it was planned that the RP2D would be determined considering the overall toxicity profiles and the plasma concentration of paclitaxel during the phase I component. For pharmacokinetic analyses of the phase I component, at least two patients at each dose level underwent blood sampling during the first cycle. The sampling times were immediately before drug administration; 0.25, 0.5, 1, 1.5, 2, 3, 4, 6, 10, and 24 hours after treatment on days 1 and 2 and 0.5 hour after administration on day 8. The levels of both paclitaxel and HM30181A were analyzed. The methods used for measuring drug concentrations were previously described in detail [1].

In the phase II component of this study, patients were treated with the RP2D, and treatment was repeated every 4 weeks. PFS was defined as the time between the first date of chemotherapy and the date of progressive disease (PD) or death by any cause. OS was estimated from the date of initiating chemotherapy to death. The response duration was measured from the time when the criteria for response (complete response [CR] or partial response [PR]) were first met until the date of PD confirmation or death. This study was designed to detect a response rate (RR) of 17% (H1: alternative hypothesis) compared with a minimal, clinically meaningful RR of 5% (H0: null hypothesis). Simon's minimax two-step design was used [2], with a type I error of 5% (two-sided) and power of 80%. Twenty-four patients were initially enrolled. When two or more responses were observed, the second stage was implemented to enroll an additional 15 patients for a total of 39 evaluable patients. To reject the null hypothesis, 5 responses were required among 39 patients. Assuming a 10% dropout rate, a total sample size of 44 patients was required. PFS and OS analyses were conducted using the Kaplan-Meier method (IBM SPSS Statistics, IBM Corp, Armonk, NY, <http://www.ibm.com>). Tumor assessments using computed tomography were performed every two cycles or if PD was suspected. RECIST was used for the tumor-response assessment.

#### Investigator's Analysis

Inactive because results did not meet the primary endpoint

## Drug Information

#### Drug 1

##### Generic/Working name

Oraxol (oral paclitaxel [capsules] and HM30181A [tablets])

##### Trade name

Oraxol

##### Company name

Hanmi Pharmaceutical Co., Ltd., Seoul, Korea

##### Drug class

Microtubule-targeting agent

##### Dose

per

##### Route

oral (po)

### Schedule of Administration

The study drug (Oraxol) consisted of two components: oral paclitaxel (capsule) and HM30181A (tablet). The dosing regimens are shown in Figure 1. Oral paclitaxel was administered at three dose levels: level 1, 180 mg/m<sup>2</sup> per week (90 mg/m<sup>2</sup> per day for 2 consecutive days); level 2, 240 mg/m<sup>2</sup> per week (120 mg/m<sup>2</sup> per day for 2 consecutive days); and level 3, 300 mg/m<sup>2</sup> per week (150 mg/m<sup>2</sup> per day for 2 consecutive days). Oral paclitaxel was administered using a 2-consecutive-day dosing schedule every week for 3 weeks (days 1, 2, 8, 9, 15, and 16), followed by 1 week off treatment. HM30181A was administered at a fixed dose (15 mg/day) on an empty stomach simultaneously with oral paclitaxel. Treatment was repeated every 4 weeks until disease progression, unacceptable toxicity, or withdrawal of consent. In the phase II component of this study, patients were treated with the RP2D, and treatment was repeated every 4 weeks. To initiate the next cycle of chemotherapy (day 1 of each cycle), the criteria of ANC  $\geq$ 1,500/mm<sup>3</sup> and platelet count  $\geq$ 100,000/mm<sup>3</sup> were required to be met. To administer the study drugs on days 8 and 15, the ANC and platelet count were required to be  $\geq$ 1,000/mm<sup>3</sup> and  $\geq$ 75,000/mm<sup>3</sup>, respectively. If a hematologic toxicity that met the criteria of DLTs, a grade 2 hepatic toxicity, a grade 2 peripheral neuropathy, or other grade 3 nonhematologic toxicity (except nausea, vomiting, anorexia, and alopecia) developed, then the paclitaxel dose was reduced to 135 mg/m<sup>2</sup> per day. If the aforementioned toxicities occurred again, then the dose was reduced to 120 mg/m<sup>2</sup> per day. If these toxicities developed again at a paclitaxel dose of 120 mg/m<sup>2</sup> per day; if they persisted for  $\geq$ 2 weeks; or if a grade 3 hepatic toxicity, a grade 3 peripheral neuropathy, or other grade 4 nonhematologic toxicity (except nausea, vomiting, anorexia, and alopecia) developed, then the study drugs were permanently withdrawn.

## Patient Characteristics

|                                     |                                                                                   |
|-------------------------------------|-----------------------------------------------------------------------------------|
| Number of patients, male            | 35                                                                                |
| Number of patients, female          | 11                                                                                |
| Stage                               | Metastatic or recurrent gastric cancer                                            |
| Age                                 | Median (range): 63.5 (39.0–82.0)                                                  |
| Number of prior systemic therapies  | Median (range): 1                                                                 |
| Performance Status: ECOG            | 0 — 13<br>1 — 32<br>2 — 1<br>3 — 0<br>Unknown — 0                                 |
| Other                               | In the phase I and II components, 10 and 46 patients were enrolled, respectively. |
| Cancer Types or Histologic Subtypes | Stomach cancer (adenocarcinoma) 46                                                |

## Primary Assessment Method

### Control Arm: Total Patient Population

|                                                     |                           |
|-----------------------------------------------------|---------------------------|
| Number of patients screened                         | 46                        |
| Number of patients enrolled                         | 46                        |
| Number of patients evaluable for toxicity           | 46                        |
| Number of patients evaluated for efficacy           | 43                        |
| Evaluation method                                   | RECIST 1.1                |
| Response assessment CR                              | <i>n</i> = 0 (0)          |
| Response assessment PR                              | <i>n</i> = 4 (9.3)        |
| Response assessment SD                              | <i>n</i> = 17 (39.5)      |
| Response assessment PD                              | <i>n</i> = 20 (46.5)      |
| Response assessment OTHER                           | <i>n</i> = 2 (4.7)        |
| (Median) duration assessments PFS                   | 2.6 months, CI: 1.7–3.5   |
| (Median) duration assessments OS                    | 10.7 months, CI: 7.2–14.2 |
| (Median) duration assessments response duration     | 5.4 months                |
| (Median) duration assessments duration of treatment | 51.5 days                 |

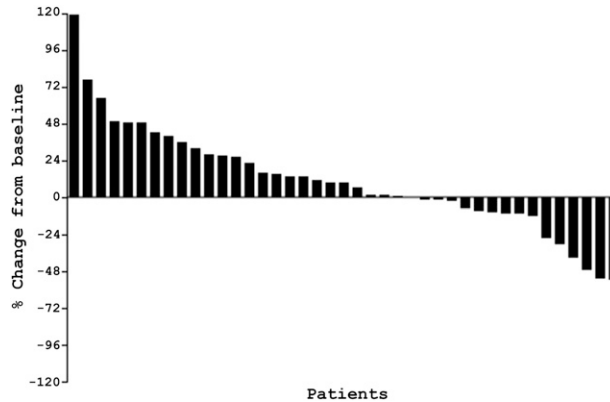

Waterfall plot of tumor response in the phase II component ( $n = 41$ ). Among 43 patients who were evaluated for efficacy, 2 patients did not undergo the planned computed tomography evaluation at 8 weeks (2 cycles after the initiation of Oraxol treatment). These two patients were excluded in this waterfall plot.

## Adverse Events

### Adverse Events At All Dose Levels, Cycle 1

| Name                                                                     | *NC/NA | 1   | 2   | 3   | 4   | 5  | All Grades |
|--------------------------------------------------------------------------|--------|-----|-----|-----|-----|----|------------|
| Fatigue (asthenia, lethargy, malaise)                                    | 78%    | 9%  | 11% | 2%  | 0%  | 0% | 22%        |
| Anorexia                                                                 | 72%    | 24% | 4%  | 0%  | 0%  | 0% | 28%        |
| Nausea                                                                   | 89%    | 9%  | 0%  | 2%  | 0%  | 0% | 11%        |
| Vomiting                                                                 | 98%    | 0%  | 0%  | 2%  | 0%  | 0% | 2%         |
| Mucositis/stomatitis (functional/symptomatic)                            | 93%    | 0%  | 7%  | 0%  | 0%  | 0% | 7%         |
| Diarrhea                                                                 | 70%    | 20% | 4%  | 7%  | 0%  | 0% | 30%        |
| Pain - Abdomen                                                           | 96%    | 4%  | 0%  | 0%  | 0%  | 0% | 4%         |
| Pruritus/itching                                                         | 91%    | 4%  | 4%  | 0%  | 0%  | 0% | 9%         |
| Hair loss/alopecia (scalp or body)                                       | 74%    | 26% | 0%  | 0%  | 0%  | 0% | 26%        |
| Neuropathy: sensory                                                      | 98%    | 0%  | 2%  | 0%  | 0%  | 0% | 2%         |
| Neuropathy: motor                                                        | 98%    | 0%  | 2%  | 0%  | 0%  | 0% | 2%         |
| Neurology - Neuropathy that was not specified as either motor or sensory | 93%    | 4%  | 2%  | 0%  | 0%  | 0% | 7%         |
| Neutrophils/granulocytes (ANC/AGC)                                       | 67%    | 0%  | 2%  | 17% | 13% | 0% | 33%        |
| Hemoglobin                                                               | 93%    | 0%  | 4%  | 2%  | 0%  | 0% | 7%         |
| Leukocytes (total WBC)                                                   | 96%    | 0%  | 2%  | 0%  | 2%  | 0% | 4%         |
| Platelets                                                                | 98%    | 0%  | 2%  | 0%  | 0%  | 0% | 2%         |

#### Adverse Events Legend

\*No Change from Baseline/No Adverse Event

Treatment-emergent adverse events related to the study drug in the phase II component ( $n = 46$ ). In both phase I and II components, physical examination, blood tests (complete blood count [CBC], chemistry, and electrolytes), and urine analyses were performed before each cycle of chemotherapy. On days 8 and 15 of each cycle, a CBC was performed before the administration of study drugs. Adverse events were graded according to the National Cancer Institute Common Terminology Criteria for Adverse Events (version 3.0).

## Assessment, Analysis, and Discussion

### Completion

Study completed

### Pharmacokinetics / Pharmacodynamics

Not collected

### Investigator's Assessment

Inactive because results did not meet the primary endpoint

## Discussion

In patients with metastatic or recurrent gastric cancer (GC), a doublet of fluoropyrimidine and platinum with or without a third drug is considered the standard first-line palliative chemotherapy. Recently, three phase III clinical trials demonstrated a survival benefit from second-line cytotoxic chemotherapy using a taxane or irinotecan [3–6]. In addition, ramucirumab, an antibody against vascular endothelial growth factor receptor 2, also exhibited a survival benefit compared with supportive care alone in a phase III trial [7]. Consequently, second-line palliative chemotherapy has become widely used in clinical practice. For second-line chemotherapy, weekly paclitaxel is one of the most widely used regimens [8–10], and it has been used as the reference regimen in several multinational randomized clinical trials [11, 12].

Paclitaxel is active against a wide variety of solid tumors including GC [8–15]. Because of the poor oral bioavailability of paclitaxel, which originates mainly from its high affinity for P-glycoprotein in the gastrointestinal mucosa [16], it must be administered intravenously. The original formulation of paclitaxel (Taxol; Bristol-Myers Squibb, New York, NY, <http://www.bms.com>) also contains the vehicle Cremophor EL (CrEL). This formulation of paclitaxel containing CrEL inconveniences patients and increases the risk of toxicities. Therefore, there have been many efforts to overcome the drawbacks of this paclitaxel formulation and develop a new oral formulation [1, 17, 18].

Recently, Hanmi Pharmaceutical (<http://www.hanmipharm.com>) developed Oraxol, an oral drug composed of paclitaxel and HM30181A [1, 19]. HM30181A, [2-(2-{4-[2-(6,7-dimethoxy-3,4-dihydro-1*H*-isoquinolin-2-yl)-ethyl]-phenyl}-2*H*-tetrazol-5-yl)-4,5-dimethoxyphenyl]amide, inhibits P-glycoprotein in the gastrointestinal mucosa [19]. A previous study demonstrated that the coadministration of HM30181A (10 mg/kg) greatly increased the oral bioavailability of paclitaxel from 3.4% to 41.3% in rats [19]. In addition, the safety and pharmacokinetics of HM30181A were evaluated in healthy Korean volunteers [20]. In the previous first-in-human phase I study (HM-OXL-101), a solution formulation of Oraxol was administered once a week (on days 1, 8, and 15 every 4 weeks). Among the 24 patients enrolled, toxicities were generally mild, and the maximum tolerated dose (MTD) could not be defined. The effective plasma concentration was achieved at 120 mg/m<sup>2</sup> per week, and the absorption of paclitaxel tended to be limited at doses >300 mg/m<sup>2</sup> per week [1]. In the present phase I/II study (HM-OXL-201), a new formulation of Oraxol (paclitaxel capsule and HM30181A tablet) was used. A new schedule of weekly Oraxol (a 2-consecutive-day dosing schedule) was designed to maintain the plasma concentration of paclitaxel at therapeutic levels for a longer time.

In the phase I component of the present study, 10 patients were enrolled (Table 2). At dose level 3, one patient had an infection with Gram-positive bacteremia with a normal ANC on day 2 of the first cycle, but that was not considered to be caused by the study medication; therefore, this patient was replaced by another patient. The remaining patients completed the planned doses of Oraxol during the first cycle. The overall toxicities were mild, and no dose-limiting toxicity (DLT) was observed. Consequently, the MTD could not be determined. In GC cell lines, paclitaxel exhibited cytotoxicity at concentrations >0.01 μM [1, 21]. In the pharmacokinetic study of the phase I component of this study, the plasma concentration of paclitaxel over time reached the previously known effective range (0.01–0.1 μM) [1, 22] at all three paclitaxel dose levels (Fig. 2; Tables 3 and 4). The means of T<sub>>0.01</sub> (time of plasma concentration of paclitaxel >0.01 μM) at three paclitaxel dose levels were 17.7, 43.2, and 47.5 hours, respectively (Table 4). The area under the plasma concentration-time curves (AUCs) also increased according to the paclitaxel dose. Based on these toxicity and pharmacokinetic data, dose level 3 was determined to be the recommended phase II dose (RP2D). Compared with the AUCs of paclitaxel in the HM-OXL-101 study [1], the AUCs of paclitaxel in this study were smaller; however, T<sub>>0.01</sub> was longer at the PR2D (300 mg/m<sup>2</sup> per week; 47.5 hours [HM-OXL-201] vs. 39.7 hours [HM-OXL-101]) (Table 4). The median number of chemotherapy cycles in the phase I component of the present study was 2 (range: 1–3 cycles), and the median duration of Oraxol treatment was 40 days (range: 2–60 days). Compliance with Oraxol was excellent: all patients achieved 100% compliance (Table 6). Treatment-emergent adverse events (TEAEs) that developed during the phase I treatment period are presented in Table 5. Among the TEAEs related to Oraxol, only 1 patient (10%) experienced a severe TEAE (grade 3 anemia). Regarding the tumor response to study drugs (Table 2), two patients achieved stable disease (SD), and seven patients had progressive disease (PD).

In the phase II component of this study, between April 2011 and April 2012, 46 patients were enrolled (Table 7). As of September 2013, the median follow-up duration was 8.2 months (range: 0.6–22.8 months). The median number of chemotherapy cycles was 2 (range: 1–18 cycles), and the median duration of chemotherapy was 51.5 days (range: 2–502 days). The mean value of compliance for oral paclitaxel during the whole treatment period was 99.3% (range: 83.3%–100%) (Table 5). In the phase II component, three patients withdrew their consent to this study before any tumor response evaluation: one patient withdrew because of fever and delirium on day 13 of cycle 1 (not related to the study drug), a second patient withdrew because of grade 3 diarrhea on day 15 of the second cycle (possibly related to the study drug), and a third patient withdrew because of tumor bleeding and mesenteric artery occlusion/small bowel infarction. The third patient had

taken Oraxol for 2 days of the first cycle. The serious adverse event developed on day 8, and the patient died of the event on day 20 of the first cycle. These three patients were excluded from the efficacy evaluation, but they were included in the safety evaluation. Regarding adverse events, all TEAEs (regardless of a causal relationship with Oraxol) and TEAEs related to Oraxol are presented in Table 8. The overall toxicity profiles were extremely favorable. Treatment-related mortality was not observed during the whole study period. No hypersensitivity reactions developed. Among severe TEAEs related to Oraxol (grade  $\geq 3$ ), neutropenia was the most common (30.4%); however, no febrile neutropenia developed. Severe non-hematologic toxicities (grade  $\geq 3$ ) were rare, and diarrhea was the most common event (6.5%). Among 43 patients who were evaluated for efficacy, two patients underwent an unplanned tumor response evaluation using computed tomography (CT). These two patients did not undergo the planned CT evaluation at 8 weeks (2 cycles after the initiation of Oraxol treatment), but they were included in the efficacy evaluation. The efficacy results are presented in Table 1 and Figure 3. Among the 4 patients with PR, 3 patients experienced tumor progression, and 1 patient withdrew consent in the PR status (13.4 months after the initiation of Oraxol). The median response duration of these 4 patients was 5.4 months (95% confidence interval: 3.1–7.6 months).

In the phase II component, this weekly Oraxol regimen displayed favorable toxicity profiles (Table 8). The incidence of severe neutropenia was 30.4%, which was similar to that reported in previous phase III trials of second-line weekly paclitaxel in GC (18.8%–30.2%) [10–12]. In particular, Oraxol appears to cause less peripheral neuropathy (all grades:  $< 10\%$  of patients; grade  $\geq 3$ : no patients), which is one of the most frequent nonhematologic toxicities that patients receiving paclitaxel encounter, compared with conventional weekly paclitaxel (all grades: 21.7%–57.4% of patients; grade  $\geq 3$ : 0%–7.4% of patients) [10–12]. In our study, weekly Oraxol was associated with a response rate (RR) of 9.3% and progress-free survival (PFS) and overall survival (OS) of 2.6 and 10.7 months, respectively. From a statistical perspective, because the RR of weekly Oraxol was 9.3%, our study did not meet the primary endpoint. Considering that conventional weekly paclitaxel showed the RR in the range of 9%–20.9% in previous phase III trials [10–12], the assumption (H1) of RR of 17% in this study using weekly Oraxol might have been too high to achieve. In contrast, from a clinical perspective concerning the second-line treatment of metastatic or recurrent GC, weekly Oraxol does not appear to be inferior to other cytotoxic agents commonly used as second-line chemotherapy in GC [3–5, 10–12]. Regarding weekly paclitaxel, RRs of 9%–20.9% and PFS, and OS of 2.9–4.4 and 7.4–9.5 months, respectively, were reported in previous phase III trials [10–12]. Although the primary endpoint was not met, we demonstrated that Oraxol has its own advantages (favorable safety profiles, including less neuropathy and no hypersensitivity reactions, and the convenience of oral administration) over conventional paclitaxel. Consequently, we believe that Oraxol is worthy of further investigation. In particular, the combination of Oraxol with various chemotherapeutic agents is expected to be very promising because Oraxol displayed favorable toxicity profiles. Further studies of Oraxol as monotherapy or in combination with other chemotherapeutic drugs are warranted in various solid tumors including GC.

## References

1. Lee HJ, Heo DS, Cho JY et al. A phase I study of oral paclitaxel with a novel P-glycoprotein inhibitor, HM30181A, in patients with advanced solid cancer. *Cancer Res Treat* 2014;46:234–242.
2. Simon R. Optimal two-stage designs for phase II clinical trials. *Control Clin Trials* 1989;10:1–10.
3. Thuss-Patience PC, Kretzschmar A, Bichev D et al. Survival advantage for irinotecan versus best supportive care as second-line chemotherapy in gastric cancer—a randomised phase III study of the Arbeitsgemeinschaft Internistische Onkologie (AIO). *Eur J Cancer* 2011;47:2306–2314.
4. Kang JH, Lee SI, Lim do H et al. Salvage chemotherapy for pretreated gastric cancer: A randomized phase III trial comparing chemotherapy plus best supportive care with best supportive care alone. *J Clin Oncol* 2012;30:1513–1518.
5. Ford HE, Marshall A, Bridgewater JA et al. Docetaxel versus active symptom control for refractory oesophagogastric adenocarcinoma (COUGAR-02): An open-label, phase 3 randomised controlled trial. *Lancet Oncol* 2014;15:78–86.
6. Kim HS, Kim HJ, Kim SY et al. Second-line chemotherapy versus supportive cancer treatment in advanced gastric cancer: A meta-analysis. *Ann Oncol* 2013;24:2850–2854.
7. Fuchs CS, Tomasek J, Yong CJ et al. Ramucicromab monotherapy for previously treated advanced gastric or gastro-oesophageal junction adenocarcinoma (REGARD): An international, randomised, multicentre, placebo-controlled, phase 3 trial. *Lancet* 2014;383:31–39.
8. Hironaka S, Zenda S, Boku N et al. Weekly paclitaxel as second-line chemotherapy for advanced or recurrent gastric cancer. *Gastric Cancer* 2006;9:14–18.
9. Kodera Y, Ito S, Mochizuki Y et al. A phase II study of weekly paclitaxel as second-line chemotherapy for advanced gastric Cancer (CCOG0302 study). *Anticancer Res* 2007;27:2667–2671.
10. Hironaka S, Ueda S, Yasui H et al. Randomized, open-label, phase III study comparing irinotecan with paclitaxel in patients with advanced gastric cancer without severe peritoneal metastasis after failure of prior combination chemotherapy using fluoropyrimidine plus platinum: WJOG 4007 trial. *J Clin Oncol* 2013;31:4438–4444.

11. Wilke H, Muro K, Van Cutsem E et al. Ramucirumab plus paclitaxel versus placebo plus paclitaxel in patients with previously treated advanced gastric or gastro-oesophageal junction adenocarcinoma (RAINBOW): A double-blind, randomised phase 3 trial. *Lancet Oncol* 2014;15: 1224–1235.
12. Satoh T, Xu RH, Chung HC et al. Lapatinib plus paclitaxel versus paclitaxel alone in the second-line treatment of HER2-amplified advanced gastric cancer in Asian populations: TyTAN—a randomized, phase III study. *J Clin Oncol* 2014;32:2039–2049.
13. Kim JH, Lee KW, Kim YH et al. Individualized tumor response testing for prediction of response to paclitaxel and cisplatin chemotherapy in patients with advanced gastric cancer. *J Korean Med Sci* 2010;25:684–690.
14. Lee KW, Im SA, Yun T et al. Phase II trial of low-dose paclitaxel and cisplatin in patients with advanced gastric cancer. *Jpn J Clin Oncol* 2005;35: 720–726.
15. Lee KW, Kim JH, Yun T et al. Phase II study of low-dose paclitaxel and cisplatin as a second-line therapy after 5-fluorouracil/platinum chemotherapy in gastric cancer. *J Korean Med Sci* 2007;22(suppl):S115–S121.
16. Sparreboom A, van Asperen J, Mayer U et al. Limited oral bioavailability and active epithelial excretion of paclitaxel (Taxol) caused by P-glycoprotein in the intestine. *Proc Natl Acad Sci USA* 1997;94:2031–2035.
17. Bröker LE, Veltkamp SA, Heath EI et al. A phase I safety and pharmacologic study of a twice weekly dosing regimen of the oral taxane BMS-275183. *Clin Cancer Res* 2007;13:3906–3912.
18. Hong YS, Kim KP, Lim HS et al. A phase I study of DHP107, a mucoadhesive lipid form of oral paclitaxel, in patients with advanced solid tumors: Crossover comparisons with intravenous paclitaxel. *Invest New Drugs* 2013;31:616–622.
19. Kwak JO, Lee SH, Lee GS et al. Selective inhibition of MDR1 (ABCB1) by HM30181 increases oral bioavailability and therapeutic efficacy of paclitaxel. *Eur J Pharmacol* 2010;627:92–98.
20. Kim TE, Gu N, Yoon SH et al. Tolerability and pharmacokinetics of a new P-glycoprotein inhibitor, HM30181, in healthy Korean male volunteers: Single- and multiple-dose randomized, placebo-controlled studies. *Clin Ther* 2012;34:482–494.
21. Chang YF, Li LL, Wu CW et al. Paclitaxel-induced apoptosis in human gastric carcinoma cell lines. *Cancer* 1996;77:14–18.
22. Kobayashi M, Oba K, Sakamoto J et al. Pharmacokinetic study of weekly administration dose of paclitaxel in patients with advanced or recurrent gastric cancer in Japan. *Gastric Cancer* 2007;10:52–57.



## Figures and Tables

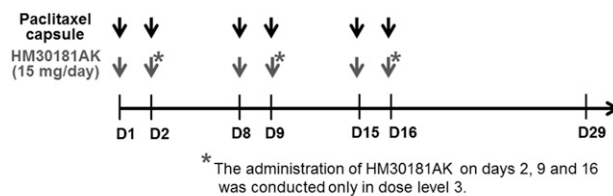

| Level | Paclitaxel capsule                                                       | HM30181AK                                               |
|-------|--------------------------------------------------------------------------|---------------------------------------------------------|
| 1     | 90 mg/m <sup>2</sup> /day<br>(day 1, 2, 8, 9, 15 and 16; every 4 weeks)  | 15 mg/day<br>(day 1, 8 and 15; every 4 weeks)           |
| 2     | 120 mg/m <sup>2</sup> /day<br>(day 1, 2, 8, 9, 15 and 16; every 4 weeks) | 15 mg/day<br>(day 1, 8 and 15; every 4 weeks)           |
| 3     | 150 mg/m <sup>2</sup> /day<br>(day 1, 2, 8, 9, 15 and 16; every 4 weeks) | 15 mg/day<br>(day 1, 2, 8, 9, 15 and 16; every 4 weeks) |

**Figure 1.** Treatment schema in the phase I component.

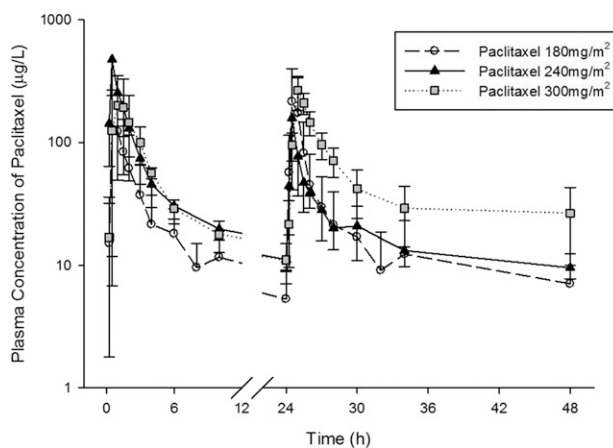

**Figure 2.** Mean concentration profile of paclitaxel after the administration of oral paclitaxel and HM30181A by paclitaxel dose group.

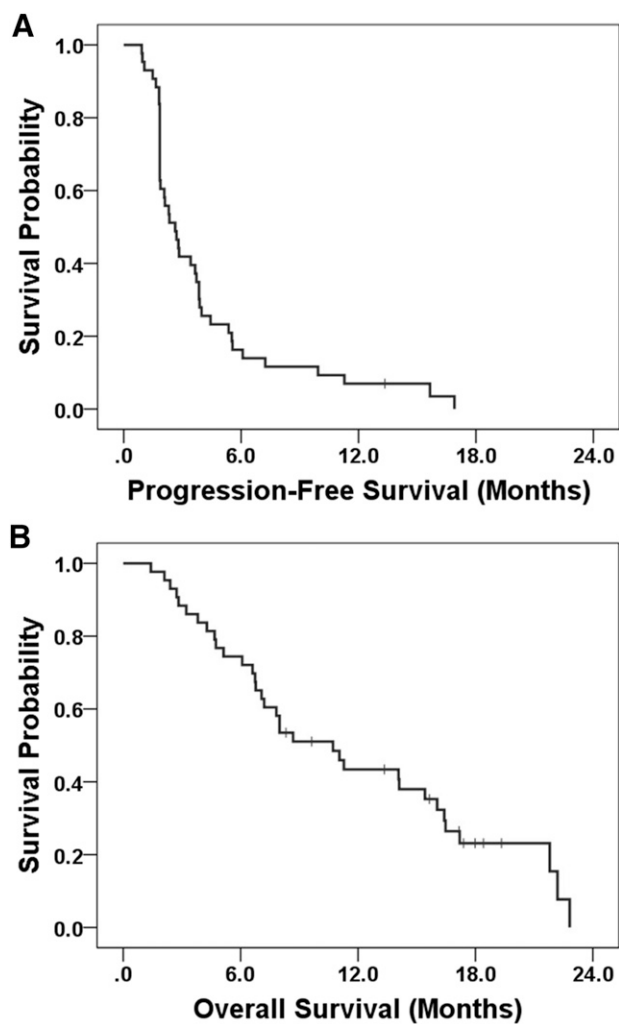

**Figure 3.** Survival probability. **(A):** Progression-free survival. **(B):** Overall survival.

**Table 1.** Efficacy results of the phase II component

| <b>Efficacy parameters (<i>n</i> = 43<sup>a</sup>)</b> | <b>Results</b>   |
|--------------------------------------------------------|------------------|
| Tumor response to Oraxol, <i>n</i> (%)                 |                  |
| Complete response                                      | 0 (0.0)          |
| Partial response                                       | 4 (9.3)          |
| Stable disease                                         | 17 (39.5)        |
| Progressive disease                                    | 20 (46.5)        |
| Not evaluable                                          | 2 (4.7)          |
| Overall response rate, % (95% CI)                      | 9.3 (2.6–22.1)   |
| Disease control rate, % (95% CI)                       | 48.8 (33.3–64.5) |
| Progression-free survival, months, median (95% CI)     | 2.6 (1.7–3.5)    |
| Overall survival, months, median (95% CI)              | 10.7 (7.2–14.2)  |

<sup>a</sup>Among 43 patients who were evaluated for efficacy, 2 patients underwent an unplanned tumor response evaluation using CT. These 2 patients did not undergo the planned CT evaluation at 8 weeks (2 cycles after the initiation of Oraxol treatment), but they were included in the efficacy evaluation. Abbreviations: CI, confidence interval; CT, computed tomography.

**Table 2.** Patient characteristics and response to Oraxol in the phase I component

| Phase I                                   | Level 1<br>( <i>n</i> = 3) <sup>a</sup> | Level 2<br>( <i>n</i> = 3) <sup>b</sup> | Level 3<br>( <i>n</i> = 4) <sup>c</sup> | Total<br>( <i>n</i> = 10) |
|-------------------------------------------|-----------------------------------------|-----------------------------------------|-----------------------------------------|---------------------------|
| Age (years)                               |                                         |                                         |                                         |                           |
| Median                                    | 66.0                                    | 58.0                                    | 54.5                                    | 56.5                      |
| Minimum, maximum                          | 46.0, 71.0                              | 44.0, 63.0                              | 51.0, 76.0                              | 44.0, 76.0                |
| Sex, <i>n</i>                             |                                         |                                         |                                         |                           |
| Male                                      | 2                                       | 2                                       | 4                                       | 8                         |
| Female                                    | 1                                       | 1                                       | 0                                       | 2                         |
| Tumor type, <i>n</i>                      |                                         |                                         |                                         |                           |
| Stomach cancer (adenocarcinoma)           | 3                                       | 3                                       | 2                                       | 8                         |
| Colon cancer (adenocarcinoma)             | 0                                       | 0                                       | 1                                       | 1                         |
| Carcinoma of unknown primary site         | 0                                       | 0                                       | 1                                       | 1                         |
| Prior surgery, <i>n</i>                   |                                         |                                         |                                         |                           |
| Subtotal gastrectomy                      | 1                                       | 1                                       | 2                                       | 4                         |
| Total gastrectomy                         | 2                                       | 2                                       | 0                                       | 4                         |
| Left hemicolectomy                        | 0                                       | 0                                       | 1                                       | 1                         |
| None                                      | 0                                       | 0                                       | 1                                       | 1                         |
| Prior palliative chemotherapy, <i>n</i>   |                                         |                                         |                                         |                           |
| 0–1 regimen                               | 0                                       | 0                                       | 0                                       | 0                         |
| 2 regimens                                | 1                                       | 0                                       | 0                                       | 1                         |
| 3 regimens                                | 1                                       | 2                                       | 1                                       | 4                         |
| 4 regimens                                | 0                                       | 1                                       | 1                                       | 2                         |
| ≥5 regimens                               | 1                                       | 0                                       | 2                                       | 3                         |
| Prior radiation therapy, <i>n</i>         |                                         |                                         |                                         |                           |
| No                                        | 2                                       | 2                                       | 2                                       | 6                         |
| Yes                                       | 1                                       | 1                                       | 2                                       | 4                         |
| ECOG PS, <i>n</i>                         |                                         |                                         |                                         |                           |
| 0                                         | 3                                       | 3                                       | 2                                       | 8                         |
| 1                                         | 0                                       | 0                                       | 2                                       | 2                         |
| 2                                         | 0                                       | 0                                       | 0                                       | 0                         |
| Best overall response to Oraxol, <i>n</i> |                                         |                                         |                                         |                           |
| Complete response                         | 0                                       | 0                                       | 0                                       | 0                         |
| Partial response                          | 0                                       | 0                                       | 0                                       | 0                         |
| Stable disease                            | 0                                       | 2                                       | 0                                       | 2                         |
| Progressive disease                       | 3                                       | 1                                       | 3                                       | 7                         |
| Not applicable                            | 0                                       | 0                                       | 1 <sup>d</sup>                          | 1 <sup>d</sup>            |

<sup>a</sup>Level 1: HM30181A tablet 15 mg plus paclitaxel capsule 180 mg/m<sup>2</sup>/week,

<sup>b</sup>Level 2: HM30181A tablet 15 mg plus paclitaxel capsule 240 mg/m<sup>2</sup>/week

<sup>c</sup>Level 3: HM30181A tablet 15 mg plus paclitaxel capsule 300 mg/m<sup>2</sup>/week

<sup>d</sup>In one patient who developed Gram-positive bacteremia, which was not considered to be caused by the study medication, the tumor-response evaluation could not be done because of early dropout from this study.

Abbreviation: ECOG PS, Eastern Cooperative Oncology Group performance status.

**Table 3.** Pharmacokinetic results of paclitaxel after administration of Oraxol (oral paclitaxel and 15 mg of HM30181A)

| Pharmacokinetic parameters                  | Day 1                 | Day 2                 |
|---------------------------------------------|-----------------------|-----------------------|
| Paclitaxel 180 mg/m <sup>2</sup> , <i>n</i> | 3                     | 3                     |
| <i>C</i> <sub>max</sub>                     |                       |                       |
| μg/L                                        | 137.3 ± 137.3         | 215.5 ± 182.0         |
| μM                                          | 0.16 ± 0.16           | 0.25 ± 0.21           |
| <i>C</i> <sub>max</sub> /dose, μg/L/mg      | 0.98 ± 0.99           | 1.53 ± 1.31           |
| <i>T</i> <sub>max</sub> , h                 | 1.00 [0.50, ~6.00]    | 0.5 [0.5, ~0.5]       |
| <i>t</i> <sub>1/2</sub> , h                 | 11.68 ± 4.56          | 17.28 ± 3.43          |
| MRT, h                                      | 7.23 ± 2.29           | 6.37 ± 0.64           |
| CL/F, L/h                                   | 777.5 ± 1,039.7       | 640.3 ± 858.0         |
| <i>V</i> <sub>z</sub> /F, L                 | 9,902 ± 11,364        | 16,062 ± 21,383       |
| AUC <sub>last</sub>                         |                       |                       |
| μg × h/L                                    | 462.8 ± 343.9         | 527.2 ± 431.1         |
| μM × h                                      | 0.54 ± 0.40           | 0.62 ± 0.50           |
| AUC <sub>inf</sub>                          |                       |                       |
| μg × h/L                                    | 563.0 ± 424.5         | 697.7 ± 542.2         |
| μM × h                                      | 0.66 ± 0.50           | 0.82 ± 0.63           |
| AUC <sub>last</sub> /dose, h × μg/L/mg      | 3.28 ± 2.51           | 3.73 ± 3.13           |
| AUC <sub>%extra</sub> , %                   | 15.66 [15.35, ~19.68] | 29.38 [20.18, ~29.86] |
| AUC <sub>inf</sub> /dose, h × μg/L/mg       | 3.98 ± 3.09           | 4.94 ± 3.94           |
| Paclitaxel 240 mg/m <sup>2</sup> , <i>n</i> | 3                     | 3                     |
| <i>C</i> <sub>max</sub>                     |                       |                       |
| μg/L                                        | 504.6 ± 439.9         | 159.4 ± 114.3         |
| μM                                          | 0.59 ± 0.52           | 0.19 ± 0.13           |
| <i>C</i> <sub>max</sub> /dose, μg/L/mg      | 2.65 ± 2.31           | 0.89 ± 0.65           |
| <i>T</i> <sub>max</sub> , h                 | 0.52 [0.50, ~1.48]    | 0.52 [0.50, ~2.00]    |
| <i>t</i> <sub>1/2</sub> , h                 | 14.59 ± 1.44          | 14.96 ± 4.85          |
| MRT, h                                      | 5.57 ± 1.23           | 8.16 ± 1.84           |
| CL/F, L/h                                   | 154.2 ± 12.7          | 303.0 ± 107.7         |
| <i>V</i> <sub>z</sub> /F, L                 | 3,259 ± 534           | 6,325 ± 2,057         |
| AUC <sub>last</sub>                         |                       |                       |
| μg × h/L                                    | 993.7 ± 76.9          | 456.3 ± 120.4         |
| μM × h                                      | 1.16 ± 0.09           | 0.53 ± 0.14           |
| AUC <sub>inf</sub>                          |                       |                       |
| μg × h/L                                    | 1,227 ± 93.8          | 655.5 ± 119.9         |
| μM × h                                      | 1.44 ± 0.11           | 0.77 ± 0.14           |
| AUC <sub>%extra</sub> , %                   | 20.08 [16.46, ~20.46] | 33.87 [23.38, ~35.82] |
| AUC <sub>last</sub> /dose, h × μg/L/mg      | 5.28 ± 0.45           | 2.51 ± 1.04           |
| AUC <sub>inf</sub> /dose, h × μg/L/mg       | 6.51 ± 0.54           | 3.57 ± 1.16           |
| Paclitaxel 300 mg/m <sup>2</sup> , <i>n</i> | 3                     | 3                     |
| <i>C</i> <sub>max</sub>                     |                       |                       |
| μg/L                                        | 250.6 ± 100.4         | 276.2 ± 73.3          |
| μM                                          | 0.29 ± 0.12           | 0.32 ± 0.09           |
| <i>C</i> <sub>max</sub> /dose, μg/L/mg      | 0.92 ± 0.43           | 1.02 ± 0.42           |
| <i>T</i> <sub>max</sub> , h                 | 1.50 [1.00, ~3.00]    | 1.00 [0.98, ~1.50]    |
| <i>t</i> <sub>1/2</sub> , h                 | 16.44 ± 2.66          | 18.45 ± 10.89         |
| MRT, h                                      | 6.48 ± 1.45           | 7.63 ± 1.31           |

|                                        |                       |                       |
|----------------------------------------|-----------------------|-----------------------|
| CL/F, L/h                              | 278.9 ± 125.8         | 181.1 ± 91.0          |
| V <sub>z</sub> /F, L                   | 6,444 ± 2,691         | 5,006 ± 3,529         |
| AUC <sub>last</sub>                    |                       |                       |
| μg × h/L                               | 846.3 ± 283.1         | 1,157.1 ± 409.7       |
| μM × h                                 | 0.99 ± 0.33           | 1.36 ± 0.48           |
| AUC <sub>inf</sub>                     |                       |                       |
| μg × h/L                               | 1,119 ± 382.3         | 1,744 ± 611.4         |
| μM × h                                 | 1.31 ± 0.45           | 2.04 ± 0.72           |
| AUC <sub>%extra</sub> , %              | 28.13 [15.43, ~29.27] | 30.88 [22.22, ~45.23] |
| AUC <sub>last</sub> /dose, h × μg/L/mg | 3.11 ± 1.33           | 4.28 ± 2.01           |
| AUC <sub>inf</sub> /dose, h × μg/L/mg  | 4.14 ± 1.92           | 6.36 ± 2.52           |

All values except T<sub>max</sub> and AUC<sub>%extra</sub> are presented as mean ± SD. T<sub>max</sub> and AUC<sub>%extra</sub> are presented as median [minimum, maximum]. Abbreviations: AUC<sub>%extra</sub>, [(AUC<sub>inf</sub>-AUC<sub>last</sub>) / AUC<sub>inf</sub>] × 100; AUC<sub>inf</sub>, area under the plasma concentration-time curve from 0 to infinite time; AUC<sub>last</sub>, area under the plasma concentration-time curve from 0 to last time to measure plasma concentration; CL/F, oral clearance; C<sub>max</sub>, maximum plasma concentration; h, hours; MRT, mean residence time; SD, standard deviation; t<sub>1/2</sub>, elimination half-life; T<sub>max</sub>, time required to reach C<sub>max</sub>; V<sub>z</sub>/F, apparent volume of distribution following oral administration.

**Table 4.** Comparison of paclitaxel pharmacokinetic results between HM-OXL-101 [1] and HM-OXL-201

| Pharmacokinetics               | HM-OXL-101 (Oraxol solution) | HM-OXL-201 (Oraxol capsule)                                     |
|--------------------------------|------------------------------|-----------------------------------------------------------------|
| Dosage level 1                 | 180 mg/m <sup>2a</sup>       | 180 mg/m <sup>2</sup> (90 × 2 mg/m <sup>2</sup> ) <sup>b</sup>  |
| AUC <sub>last</sub> (μg × h/L) | 1,673.9                      | 990.10 ± 739.37                                                 |
| AUC <sub>inf</sub> (μg × h/L)  | 1,985.0                      | 1,160.6 ± 858.63                                                |
| T <sub>&gt;0.01</sub> (h)      | 40.75 ± 9.90                 | 17.72 ± 15.84                                                   |
| T <sub>&gt;0.05</sub> (h)      | 4.63 ± 0.18                  | 4.63 <sup>a</sup> ± 0.88                                        |
| T <sub>&gt;0.1</sub> (h)       | 2.5 ± 0                      | 2.38 <sup>a</sup> ± 0.18                                        |
| Dosage level 2                 | 240 mg/m <sup>2b</sup>       | 240 mg/m <sup>2</sup> (120 × 2 mg/m <sup>2</sup> ) <sup>b</sup> |
| AUC <sub>last</sub> (μg × h/L) | 2,547.4 ± 1,000.3            | 1,450.0 ± 55.92                                                 |
| AUC <sub>inf</sub> (μg × h/L)  | 2,971.2 ± 941.1              | 1,649.1 ± 73.66                                                 |
| T <sub>&gt;0.01</sub> (h)      | 47.77 ± 0.04                 | 43.16 ± 8.12                                                    |
| T <sub>&gt;0.05</sub> (h)      | 7.33 ± 2.65                  | 3.98 ± 1.20                                                     |
| T <sub>&gt;0.1</sub> (h)       | 4.92 ± 3.00                  | 2.56 ± 0.81                                                     |
| Dosage level 3                 | 300 mg/m <sup>2b</sup>       | 300 mg/m <sup>2</sup> (150 × 2 mg/m <sup>2</sup> ) <sup>b</sup> |
| AUC <sub>last</sub> (μg × h/L) | 3,135.0 ± 1,450.1            | 2,003.5 ± 514.55                                                |
| AUC <sub>inf</sub> (μg × h/L)  | 3,481.1 ± 1,580.0            | 2,590.1 ± 528.17                                                |
| T <sub>&gt;0.01</sub> (h)      | 39.7 ± 13.94                 | 47.46 ± 0.41                                                    |
| T <sub>&gt;0.05</sub> (h)      | 7.98 ± 3.06                  | 12.91 ± 12.28                                                   |
| T <sub>&gt;0.1</sub> (h)       | 5.67 ± 3.70                  | 3.34 ± 0.77                                                     |

All values are presented as mean ± SD. In the HM-OXL-101 study, Oraxol was administered once a week, and the blood-sampling times for paclitaxel were 0, 0.25, 0.5, 1, 2, 3, 4, 5, 6, 8, 10, 24, 34, and 48 hours. In the present study (HM-OXL-201), Oraxol was administered twice a week (days 1 and 2), and the blood-sampling times were 0, 0.25, 0.5, 1, 1.5, 2, 3, 4, 6, 10, and 24 hours on days 1 and 2. In the present study (HM-OXL-201), total AUC<sub>last</sub> [= AUC<sub>last</sub>(day 1) + AUC<sub>last</sub>(day 2)] and total AUC<sub>inf</sub> [= AUC<sub>inf</sub>(day 1) + AUC<sub>inf</sub>(day 2)] are presented. In this table, AUC<sub>last</sub> of the HM-OXL-201 study was calculated as follows; AUC<sub>last</sub>, AUC<sub>last</sub> (day 1) + AUC<sub>last</sub> (day 2).

<sup>a</sup>n = 2.

<sup>b</sup>n = 3.

Abbreviations: AUC<sub>inf</sub>, area under the plasma concentration-time curve from 0 to infinite time; AUC<sub>last</sub>, area under the plasma concentration-time curve from 0 to last time to measure plasma concentration; h, hours; T<sub>>0.01</sub>, time of plasma concentration of paclitaxel >0.01 μM; T<sub>>0.05</sub>, time of plasma concentration of paclitaxel >0.05 μM; T<sub>>0.1</sub>, time of plasma concentration of paclitaxel >0.1 μM.

**Table 5.** Treatment-emergent adverse events that developed in the phase I component (*n* = 10)

| System organ class preferred term                    | TEAEs   |         |         |         |        | TEAEs related to the study drug |         |         |         |        |
|------------------------------------------------------|---------|---------|---------|---------|--------|---------------------------------|---------|---------|---------|--------|
|                                                      | Grade 1 | Grade 2 | Grade 3 | Grade 4 | Total  | Grade 1                         | Grade 2 | Grade 3 | Grade 4 | Total  |
| Gastrointestinal disorders                           |         |         |         |         |        |                                 |         |         |         |        |
| Abdominal pain                                       | 2 (20)  | 3 (30)  | 1 (10)  | 0       | 6 (60) | 0                               | 0       | 0       | 0       | 0      |
| Nausea                                               | 3 (30)  | 2 (20)  | 0       | 0       | 5 (50) | 2 (20)                          | 0       | 0       | 0       | 2 (20) |
| Diarrhea                                             | 3 (30)  | 0       | 0       | 0       | 3 (30) | 2 (20)                          | 0       | 0       | 0       | 2 (20) |
| Rectal tenesmus                                      | 0       | 1 (10)  | 0       | 0       | 1 (10) | 0                               | 0       | 0       | 0       | 0      |
| General disorders and administration site conditions |         |         |         |         |        |                                 |         |         |         |        |
| Pyrexia                                              | 2 (20)  | 1 (10)  | 0       | 0       | 3 (30) | 0                               | 0       | 0       | 0       | 0      |
| Fatigue                                              | 0       | 1 (10)  | 0       | 0       | 1 (10) | 0                               | 1 (10)  | 0       | 0       | 1 (10) |
| Mucosal inflammation                                 | 1 (10)  | 0       | 0       | 0       | 1 (10) | 1 (10)                          | 0       | 0       | 0       | 1 (10) |
| Blood and lymphatic system disorders                 |         |         |         |         |        |                                 |         |         |         |        |
| Neutropenia                                          | 0       | 2 (20)  | 0       | 0       | 2 (20) | 0                               | 2 (20)  | 0       | 0       | 2 (20) |
| Anemia                                               | 0       | 0       | 1 (10)  | 0       | 1 (10) | 0                               | 0       | 1 (10)  | 0       | 1 (10) |
| Leukocytosis                                         | 1 (10)  | 0       | 0       | 0       | 1 (10) | 0                               | 0       | 0       | 0       | 0      |
| Thrombocytopenia                                     | 0       | 1 (10)  | 0       | 0       | 1 (10) | 0                               | 1 (10)  | 0       | 0       | 1 (10) |
| Musculoskeletal and connective tissue disorders      |         |         |         |         |        |                                 |         |         |         |        |
| Flank pain                                           | 0       | 1 (10)  | 0       | 0       | 1 (10) | 0                               | 0       | 0       | 0       | 0      |
| Muscular weakness                                    | 1 (10)  | 0       | 0       | 0       | 1 (10) | 0                               | 0       | 0       | 0       | 0      |
| Musculoskeletal discomfort                           | 1 (10)  | 0       | 0       | 0       | 1 (10) | 0                               | 0       | 0       | 0       | 0      |
| Myalgia                                              | 0       | 1 (10)  | 0       | 0       | 1 (10) | 0                               | 0       | 0       | 0       | 0      |
| Metabolism and nutrition disorders                   |         |         |         |         |        |                                 |         |         |         |        |
| Anorexia                                             | 2 (20)  | 0       | 0       | 0       | 2 (20) | 1 (10)                          | 0       | 0       | 0       | 1 (10) |
| Hypokalemia                                          | 0       | 0       | 1 (10)  | 0       | 1 (10) | 0                               | 0       | 0       | 0       | 0      |
| Investigations                                       |         |         |         |         |        |                                 |         |         |         |        |
| Alanine aminotransferase increased                   | 0       | 1 (10)  | 0       | 0       | 1 (10) | 0                               | 0       | 0       | 0       | 0      |
| Aspartate aminotransferase increased                 | 0       | 1 (10)  | 0       | 0       | 1 (10) | 0                               | 0       | 0       | 0       | 0      |
| γ-glutamyltransferase increased                      | 0       | 1 (10)  | 0       | 0       | 1 (10) | 0                               | 0       | 0       | 0       | 0      |
| Nervous system disorders                             |         |         |         |         |        |                                 |         |         |         |        |
| Dizziness                                            | 0       | 1 (10)  | 0       | 0       | 1 (10) | 0                               | 0       | 0       | 0       | 0      |
| Neuropathy                                           | 1 (10)  | 0       | 0       | 0       | 1 (10) | 1 (10)                          | 0       | 0       | 0       | 1 (10) |
| Eye disorders                                        |         |         |         |         |        |                                 |         |         |         |        |
| Eye hemorrhage                                       | 1 (10)  | 0       | 0       | 0       | 1 (10) | 0                               | 0       | 0       | 0       | 0      |
| Infections and infestations                          |         |         |         |         |        |                                 |         |         |         |        |
| Bacteremia                                           | 0       | 0       | 1 (10)  | 0       | 1 (10) | 0                               | 0       | 0       | 0       | 0      |
| Respiratory, thoracic, and mediastinal disorders     |         |         |         |         |        |                                 |         |         |         |        |
| Hemoptysis                                           | 1 (10)  | 0       | 0       | 0       | 1 (10) | 0                               | 0       | 0       | 0       | 0      |

Data are shown as number (percentage). MedDRA version 10.0 (<http://www.meddra.org>). If TEAEs repeatedly occurred in a patient, it was regarded as one case with the most severe event recorded.

Abbreviation: TEAEs, treatment-emergent adverse events.

**Table 6.** Summary of compliance (safety population)

| Compliance             | Phase I         |                 |                 |                | Phase II<br>RD (n = 46) |
|------------------------|-----------------|-----------------|-----------------|----------------|-------------------------|
|                        | Level 1 (n = 3) | Level 2 (n = 3) | Level 3 (n = 4) | Total (n = 10) |                         |
| Oral paclitaxel        |                 |                 |                 |                |                         |
| Cycle 1                |                 |                 |                 |                |                         |
| n                      | 3               | 3               | 4               | 10             | 46                      |
| Mean (SD)              | 100 (0)         | 100 (0)         | 100 (0)         | 100 (0)        | 99.6 (2.46)             |
| Median                 | 100             | 100             | 100             | 100            | 100                     |
| Minimum, maximum       | 100, 100        | 100, 100        | 100, 100        | 100, 100       | 83.3, 100               |
| Cycle 2                |                 |                 |                 |                |                         |
| n                      | 2               | 2               | 3               | 7              | 38                      |
| Mean (SD)              | 100 (0)         | 100 (0)         | 100 (0)         | 100 (0)        | 99.1 (3.77)             |
| Median                 | 100             | 100             | 100             | 100            | 100                     |
| Minimum, maximum       | 100, 100        | 100, 100        | 100, 100        | 100, 100       | 83.3, 100               |
| Whole treatment period |                 |                 |                 |                |                         |
| n                      | 3               | 3               | 4               | 10             | 46                      |
| Mean (SD)              | 100 (0)         | 100 (0)         | 100 (0)         | 100 (0)        | 99.3 (2.95)             |
| Median                 | 100             | 100             | 100             | 100            | 100                     |
| Minimum, maximum       | 100, 100        | 100, 100        | 100, 100        | 100, 100       | 83.3, 100               |
| HM30181A               |                 |                 |                 |                |                         |
| Cycle 1                |                 |                 |                 |                |                         |
| n                      | 3               | 3               | 4               | 10             | 46                      |
| Mean (SD)              | 100 (0)         | 100 (0)         | 100 (0)         | 100 (0)        | 99.6 (2.46)             |
| Median                 | 100             | 100             | 100             | 100            | 100                     |
| Minimum, maximum       | 100, 100        | 100, 100        | 100, 100        | 100, 100       | 83.3, 100               |
| Cycle 2                |                 |                 |                 |                |                         |
| n                      | 2               | 2               | 3               | 7              | 38                      |
| Mean (SD)              | 100 (0)         | 100 (0)         | 100 (0)         | 100 (0)        | 99.1 (3.77)             |
| Median                 | 100             | 100             | 100             | 100            | 100                     |
| Minimum, maximum       | 100, 100        | 100, 100        | 100, 100        | 100, 100       | 83.3, 100               |
| Whole treatment period |                 |                 |                 |                |                         |
| n                      | 3               | 3               | 4               | 10             | 46                      |
| Mean (SD)              | 100 (0)         | 100 (0)         | 100 (0)         | 100 (0)        | 99.2 (2.95)             |
| Median                 | 100             | 100             | 100             | 100            | 100                     |
| Minimum, maximum       | 100, 100        | 100, 100        | 100, 100        | 100, 100       | 83.3, 100               |

Compliance (%) = (number of tablets actually administered / number of tablets to be administered) × 100. Level 1: HM30181A tablet 15 mg plus paclitaxel capsule 180 mg/m<sup>2</sup>/week. Level 2: HM30181A tablet 15 mg plus paclitaxel capsule 240 mg/m<sup>2</sup>/week. Level 3: HM30181A tablet 15 mg plus paclitaxel capsule 300 mg/m<sup>2</sup>/week. RD: HM30181A tablet 15 mg plus Hanmi paclitaxel capsule 300 mg/m<sup>2</sup>/week. Abbreviations: RD, recommended dose; SD, standard deviation.

**Table 7.** Patient characteristics in the phase II component

| <b>Characteristics (n = 46)</b>                 | <b>Results</b>        |
|-------------------------------------------------|-----------------------|
| Age (years)                                     |                       |
| Median (range)                                  | 63.5 (39.0–82.0)      |
| Sex, n (%)                                      |                       |
| Male                                            | 35 (76.1)             |
| Female                                          | 11 (23.9)             |
| ECOG PS, n (%)                                  |                       |
| 0                                               | 13 (28.3)             |
| 1                                               | 32 (69.6)             |
| 2                                               | 1 (2.2)               |
| Disease status (first-line chemotherapy), n (%) |                       |
| Recurrent after curative surgery                | 17 (37.0)             |
| Unresectable (distant metastasis)               | 26 (56.5)             |
| Unresectable (locally advanced)                 | 3 (6.5)               |
| Prior gastrectomy, n (%)                        |                       |
| None                                            | 18 (39.1)             |
| Subtotal gastrectomy                            | 15 (32.6)             |
| Total gastrectomy                               | 13 (28.3)             |
| Prior adjuvant chemotherapy, n (%)              |                       |
| No                                              | 33 (71.7)             |
| Yes                                             | 13 (28.3)             |
| First-line chemotherapy, n (%)                  |                       |
| S-1/cisplatin                                   | 11 (23.9)             |
| Capecitabine/oxaliplatin <sup>a</sup>           | 8 (17.4)              |
| Capecitabine/cisplatin <sup>b</sup>             | 7 (15.2)              |
| 5-FU/oxaliplatin                                | 4 (8.7)               |
| 5-FU/cisplatin                                  | 3 (6.5)               |
| S-1/oxaliplatin                                 | 3 (6.5)               |
| 5-FU/irinotecan                                 | 3 (6.5)               |
| Doxifluridine/cisplatin                         | 1 (2.2)               |
| S-1                                             | 3 (6.5)               |
| Capecitabine <sup>c</sup>                       | 3 (6.5)               |
| Metastatic sites, n (%)                         |                       |
| Lymph node                                      | 23 (50.0)             |
| Liver                                           | 19 (41.3)             |
| Peritoneum                                      | 14 (30.4)             |
| Lung                                            | 4 (8.7)               |
| Ovary                                           | 3 (27.3) <sup>d</sup> |
| Adrenal gland                                   | 2 (4.3)               |

<sup>a</sup>One patient received capecitabine/oxaliplatin plus sunitinib.

<sup>b</sup>Two patients received capecitabine/cisplatin plus sorafenib.

<sup>c</sup>One patient received capecitabine plus trastuzumab.

<sup>d</sup>Among female patients (n = 11).

Abbreviations: 5-FU, 5-fluorouracil; ECOG PS, Eastern Cooperative Oncology Group performance status.



**Table 8.** Treatment-emergent adverse events that developed in the phase II component (*n* = 46)

| System organ class preferred term                    | TEAEs     |          |          |          |         |           | TEAEs related to the study drug |          |          |          |         |           |
|------------------------------------------------------|-----------|----------|----------|----------|---------|-----------|---------------------------------|----------|----------|----------|---------|-----------|
|                                                      | Grade 1   | Grade 2  | Grade 3  | Grade 4  | Grade 5 | Total     | Grade 1                         | Grade 2  | Grade 3  | Grade 4  | Grade 5 | Total     |
| Gastrointestinal disorders                           |           |          |          |          |         |           |                                 |          |          |          |         |           |
| Abdominal pain                                       | 4 (8.7)   | 8 (17.4) | 4 (8.7)  | 0        | 0       | 16 (34.8) | 2 (4.3)                         | 0        | 0        | 0        | 0       | 2 (4.3)   |
| Diarrhea                                             | 10 (21.7) | 2 (4.3)  | 3 (6.5)  | 0        | 0       | 15 (32.6) | 9 (19.6)                        | 2 (4.3)  | 3 (6.5)  | 0        | 0       | 14 (30.4) |
| Nausea                                               | 7 (15.2)  | 4 (8.7)  | 2 (4.3)  | 0        | 0       | 13 (28.3) | 4 (8.7)                         | 0        | 1 (2.2)  | 0        | 0       | 5 (10.9)  |
| Dyspepsia                                            | 5 (10.9)  | 1 (2.2)  | 0        | 0        | 0       | 6 (13.0)  | 1 (2.2)                         | 0        | 0        | 0        | 0       | 1 (2.2)   |
| Vomiting                                             | 1 (2.2)   | 2 (4.3)  | 2 (4.3)  | 0        | 0       | 5 (10.9)  | 0                               | 0        | 1 (2.2)  | 0        | 0       | 1 (2.2)   |
| Constipation                                         | 1 (2.2)   | 4 (8.7)  | 0        | 0        | 0       | 5 (10.9)  | 0                               | 0        | 0        | 0        | 0       | 0         |
| General disorders and administration site conditions |           |          |          |          |         |           |                                 |          |          |          |         |           |
| Fatigue                                              | 5 (10.9)  | 7 (15.2) | 1 (2.2)  | 0        | 0       | 13 (28.3) | 4 (8.7)                         | 5 (10.9) | 1 (2.2)  | 0        | 0       | 10 (21.7) |
| Mucosal inflammation                                 | 0         | 3 (6.5)  | 0        | 0        | 0       | 3 (6.5)   | 0                               | 3 (6.5)  | 0        | 0        | 0       | 3 (6.5)   |
| Metabolism and nutrition disorders                   |           |          |          |          |         |           |                                 |          |          |          |         |           |
| Anorexia                                             | 10 (21.7) | 3 (6.5)  | 3 (6.5)  | 0        | 0       | 16 (34.8) | 11 (23.9)                       | 2 (4.3)  | 0        | 0        | 0       | 13 (28.3) |
| Skin and subcutaneous tissue disorders               |           |          |          |          |         |           |                                 |          |          |          |         |           |
| Alopecia                                             | 12 (26.1) | 0        | 0        | 0        | 0       | 12 (26.1) | 12 (26.1)                       | 0        | 0        | 0        | 0       | 12 (26.1) |
| Pruritus                                             | 3 (6.5)   | 3 (6.5)  | 0        | 0        | 0       | 6 (13.0)  | 2 (4.3)                         | 2 (4.3)  | 0        | 0        | 0       | 4 (8.7)   |
| Blood and lymphatic system disorders                 |           |          |          |          |         |           |                                 |          |          |          |         |           |
| Neutropenia                                          | 0         | 1 (2.2)  | 9 (19.6) | 6 (13.0) | 0       | 16 (34.8) | 0                               | 1 (2.2)  | 8 (17.4) | 6 (13.0) | 0       | 15 (32.6) |
| Anemia                                               | 0         | 2 (4.3)  | 2 (4.3)  | 1 (2.2)  | 0       | 5 (10.9)  | 0                               | 2 (4.3)  | 1 (2.2)  | 0        | 0       | 3 (6.5)   |
| Leukopenia                                           | 0         | 1 (2.2)  | 0        | 1 (2.2)  | 0       | 2 (4.3)   | 0                               | 1 (2.2)  | 0        | 1 (2.2)  | 0       | 2 (4.3)   |
| Thrombocytopenia                                     | 0         | 1 (2.2)  | 0        | 0        | 0       | 1 (2.2)   | 0                               | 1 (2.2)  | 0        | 0        | 0       | 1 (2.2)   |
| Respiratory, thoracic and mediastinal disorders      |           |          |          |          |         |           |                                 |          |          |          |         |           |
| Dyspnea                                              | 2 (4.3)   | 2 (4.3)  | 1 (2.2)  | 0        | 0       | 5 (10.9)  | 0                               | 0        | 0        | 0        | 0       | 0         |
| Nervous system disorders                             |           |          |          |          |         |           |                                 |          |          |          |         |           |
| Neuropathy <sup>a</sup>                              | 2 (4.3)   | 1 (2.2)  | 0        | 0        | 0       | 3 (6.5)   | 2 (4.3)                         | 1 (2.2)  | 0        | 0        | 0       | 3 (6.5)   |
| Peripheral sensory neuropathy                        | 2 (4.3)   | 1 (2.2)  | 0        | 0        | 0       | 3 (6.5)   | 0                               | 1 (2.2)  | 0        | 0        | 0       | 1 (2.2)   |
| Peripheral motor neuropathy                          | 0         | 1 (2.2)  | 1 (2.2)  | 0        | 0       | 2 (4.3)   | 0                               | 1 (2.2)  | 0        | 0        | 0       | 1 (2.2)   |
| Musculoskeletal and connective tissue disorders      |           |          |          |          |         |           |                                 |          |          |          |         |           |
| Back pain                                            | 2 (4.3)   | 4 (8.7)  | 0        | 0        | 0       | 6 (13.0)  | 1 (2.2)                         | 0        | 0        | 0        | 0       | 1 (2.2)   |
| Investigations                                       |           |          |          |          |         |           |                                 |          |          |          |         |           |
| Alanine aminotransferase increased                   | 0         | 1 (2.2)  | 0        | 0        | 0       | 1 (2.2)   | 0                               | 0        | 0        | 0        | 0       | 0         |
| Aspartate aminotransferase increased                 | 0         | 1 (2.2)  | 0        | 0        | 0       | 1 (2.2)   | 0                               | 0        | 0        | 0        | 0       | 0         |
| Blood alkaline phosphatase increased                 | 0         | 0        | 1 (2.2)  | 0        | 0       | 1 (2.2)   | 0                               | 0        | 0        | 0        | 0       | 0         |
| Hepatobiliary disorders                              |           |          |          |          |         |           |                                 |          |          |          |         |           |
| Hyperbilirubinemia                                   | 0         | 2 (4.3)  | 0        | 0        | 0       | 2 (4.3)   | 0                               | 0        | 0        | 0        | 0       | 0         |

Data are shown as number (percentage). This table shows all TEAEs that developed in  $\geq 10\%$  of patients (during all treatment periods) regardless of the causal relationship to the study drug, TEAEs related to the study drug that developed in  $\geq 5\%$  of patients, and adverse events of interest (all hematologic toxicities, all hepatic toxicities, and peripheral neuropathy) regardless of frequency.

<sup>a</sup>Neuropathy that was not specified as either motor or sensory was included.

Abbreviation: TEAEs, treatment-emergent adverse events.

[Click here](#) to access other published clinical trials.
